# Supplementary material
Source: publisher figshare collection journal article supplement (https://frontiersin.figshare.com/ndownloader/files/17599556)
Supplement: Supplementary file [file 17599556]

**Table S1: GPS Coordinates for Sample Collections.** Coordinates begin in Lac Cambrai, Quebec, Canada and follow southwest down the Chochocouane River. Fish were measured for total length from the snout to the end of the pinched tail.

| Collection Site | Coordinates               | Sample | Length |
|-----------------|---------------------------|--------|--------|
| 1               | 47°57'36.2"N 76°39'05.8"W | SMS01  | 53 cm  |
|                 |                           | Gut01  |        |
| 2               | 47°55'06.9"N 76°46'38.3"W | SMS02  | 51 cm  |
|                 |                           | Gut02  |        |
| 3               | 47°53'00.1"N 76°46'07.4"W | SMS03  | 46 cm  |
|                 |                           | Gut03  |        |
| 4               | 47°53'00.1"N 76°46'07.4"W | SMS04  | 53 cm  |
|                 |                           | Gut04  |        |
| 5               | 47°48'49.6"N 76°51'42.8"W | SMS05  | 71 cm  |
|                 |                           | Gut05  |        |
| 6               | 47°43'39.9"N 77°02'38.3"W | SMS06  | 91 cm  |
|                 |                           | Gut06  |        |
| 7               | 47°41'15.4"N 77°04'01.6"W | SMS07  | 51 cm  |
|                 |                           | Gut07  |        |
| 8               | 47°40'04.7"N 77°04'33.0"W | Gut08  | 64 cm  |

**Table S2: Individual Raw Read and ASV Counts.**

| Sample  | Number of Raw Read Counts | Unique ASV Counts |
|---------|---------------------------|-------------------|
| SMS01   | 52,627                    | 823               |
| SMS02   | 56,017                    | 334               |
| SMS03   | 43,380                    | 512               |
| SMS04   | 87,777                    | 498               |
| SMS05   | 11,049                    | 318               |
| SMS06   | 122,348                   | 727               |
| SMS07   | 99,797                    | 337               |
| Gut01   | 148,005                   | 27                |
| Gut02   | 99,919                    | 19                |
| Gut03   | 116,559                   | 30                |
| Gut04   | 169,618                   | 43                |
| Gut05   | 159,739                   | 49                |
| Gut06   | 178,159                   | 48                |
| Gut07   | 103,163                   | 18                |
| Gut08   | 94,814                    | 21                |
| Water01 | 125,612                   | 391               |
| Water02 | 107,543                   | 385               |
| Water03 | 34,814                    | 222               |

**Figure S1—Taxonomic Abundances of Individual Samples and Beta Diversity in Relation to Fish Length.** Differences in taxonomic relative abundance between individual samples at the Phylum (A) and Family (B) level. Fish length plotted against PCo1 of the weighted Unifrac (C). Bray-Curtis colored by sampling location (D), squares and circles represent SMS and gut respectively.

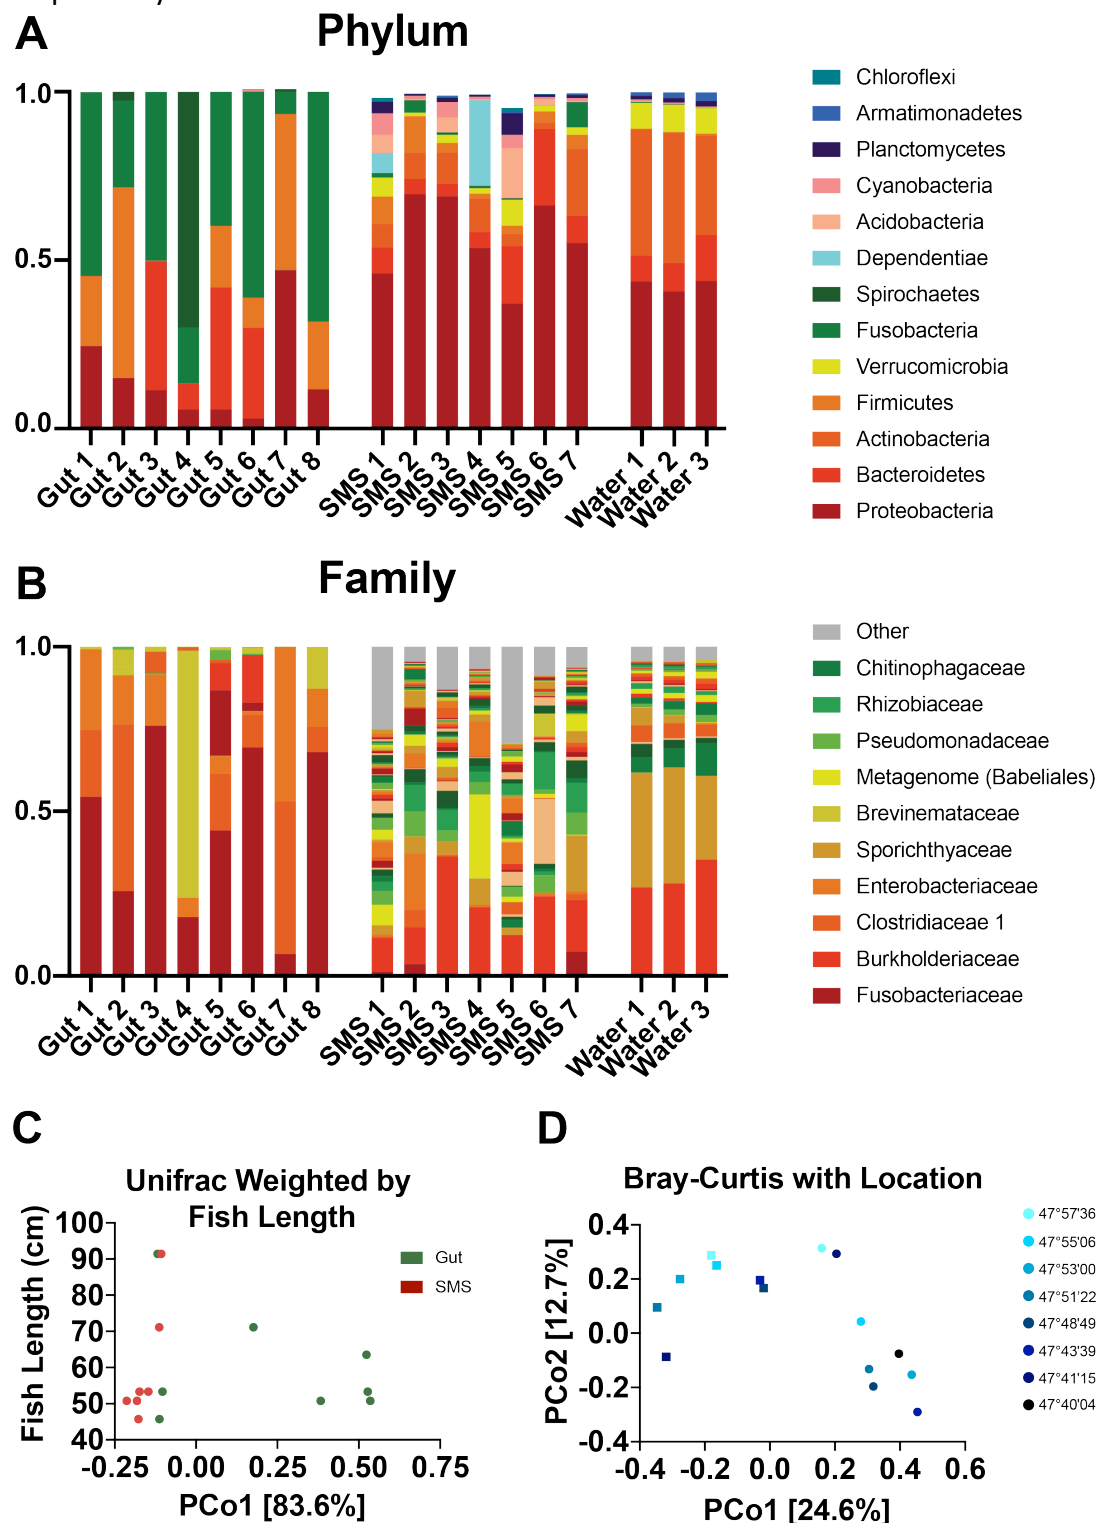

**Figure S2: Differences in Phyla Abundances Between Gut, SMS and Water Microbiomes.** LDA Scores were calculated using LEfSe and correlate with phyla enriched in their respective biome. Significance cutoffs were (A) > 4.0 and (B) > 2.5 LDA score (log10). For full list of LDA and p-values, refer to Data S3; (\*) p< 0.05, (\*\*) p<0.01, (\*\*\*) p<0.001].

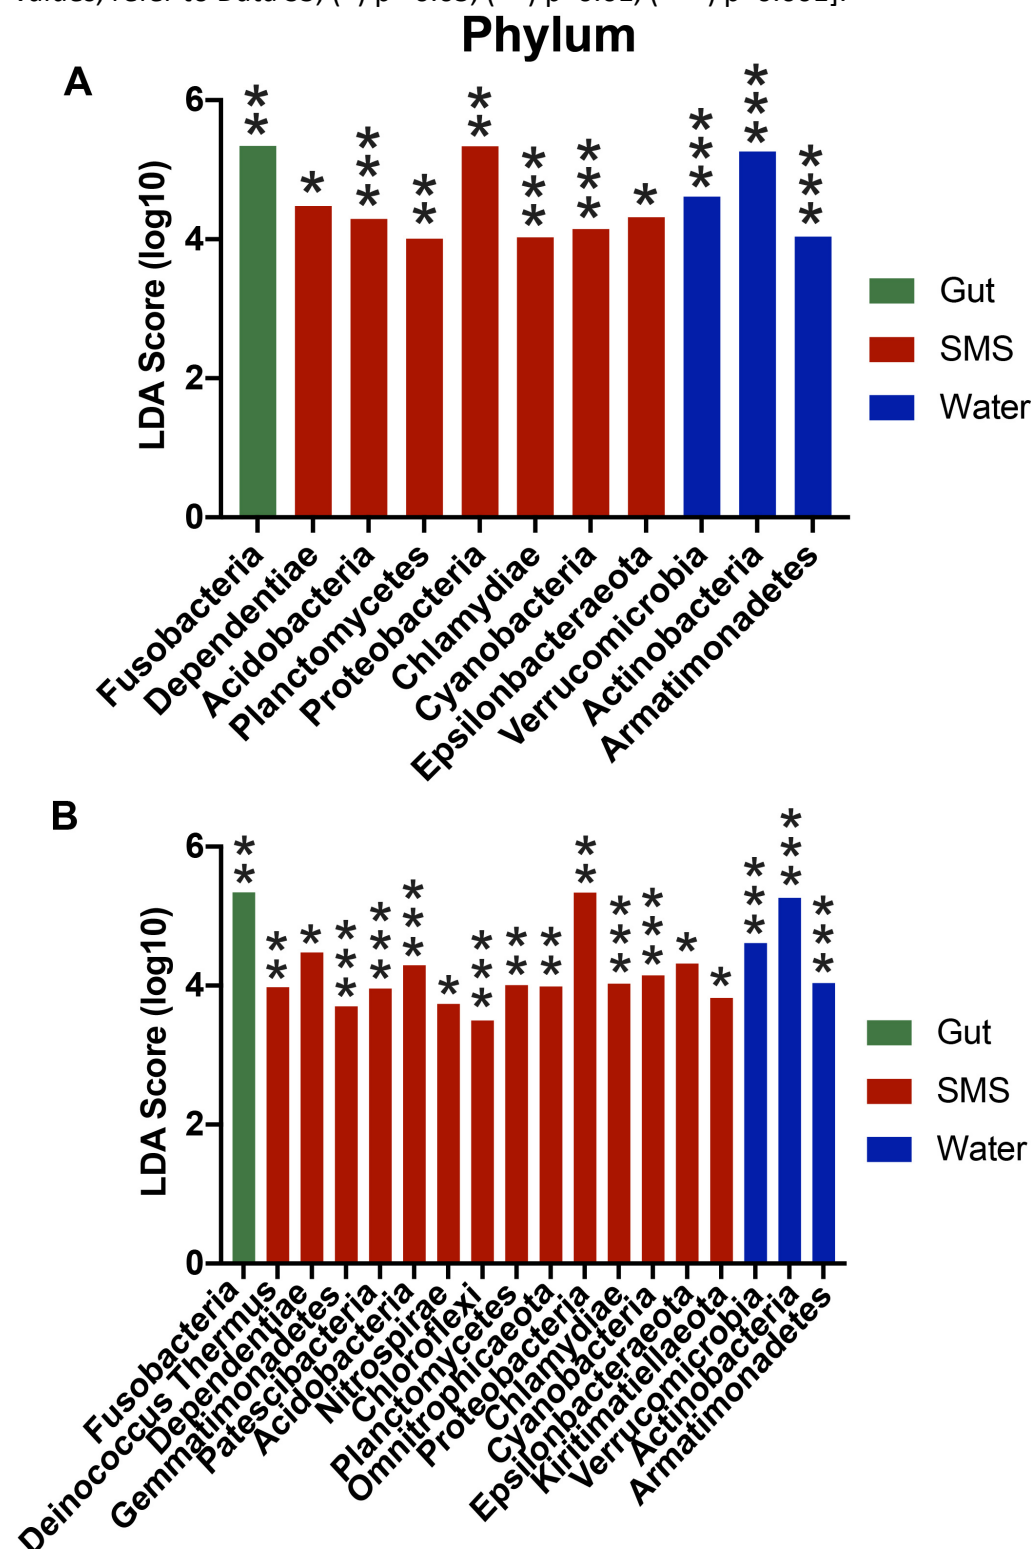

**Figure S3: Differences in Family Abundances Between Gut, SMS and Water Microbiomes with cutoff of LDA > 2.5.** LDA Scores were calculated using LEfSe and correlate with families enriched in their respective biome. For full list of LDA and corresponding p-values, refer to Data S3.

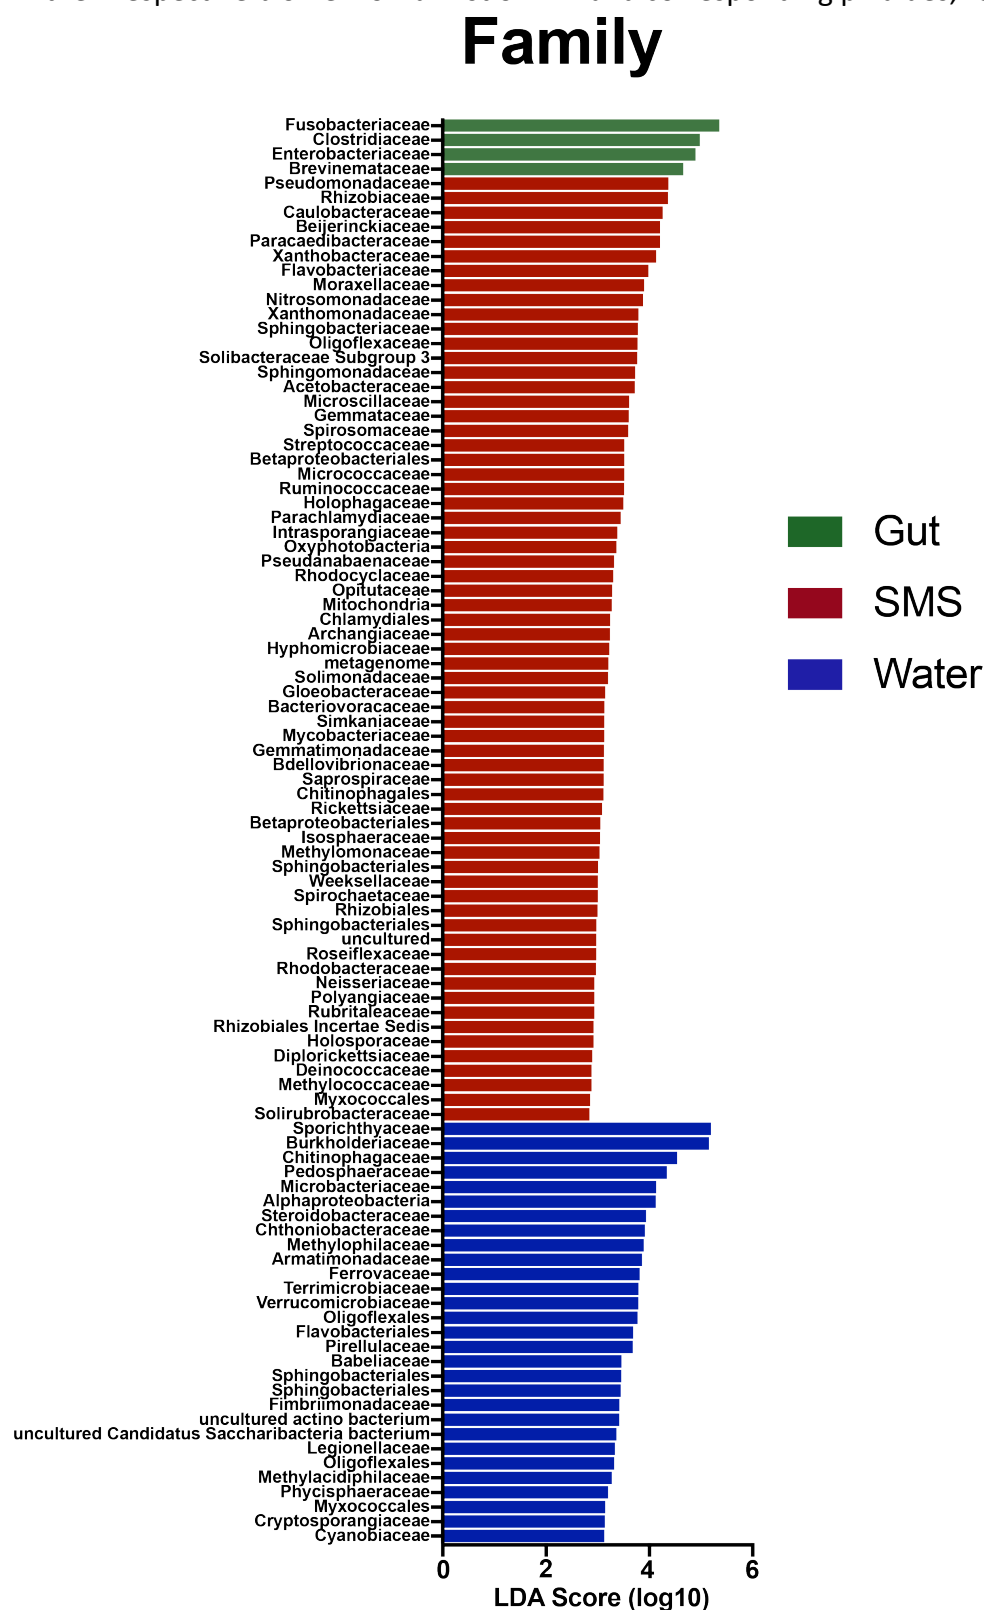



**Figure S5: Predicted Metagenomic Function: Metacyc Pathways of the Gut, SMS and Water Microbiomes.** Enriched pathways for the water (A), SMS (B), and gut (C) microbiomes. Pathways were predicted via the PICRUST2 plugin within QIIME2 and mapped into the KEGG Orthologs and Pathways database. Associated pathways were grouped based on general function (for itemized list of pathway refer to S2 Data).

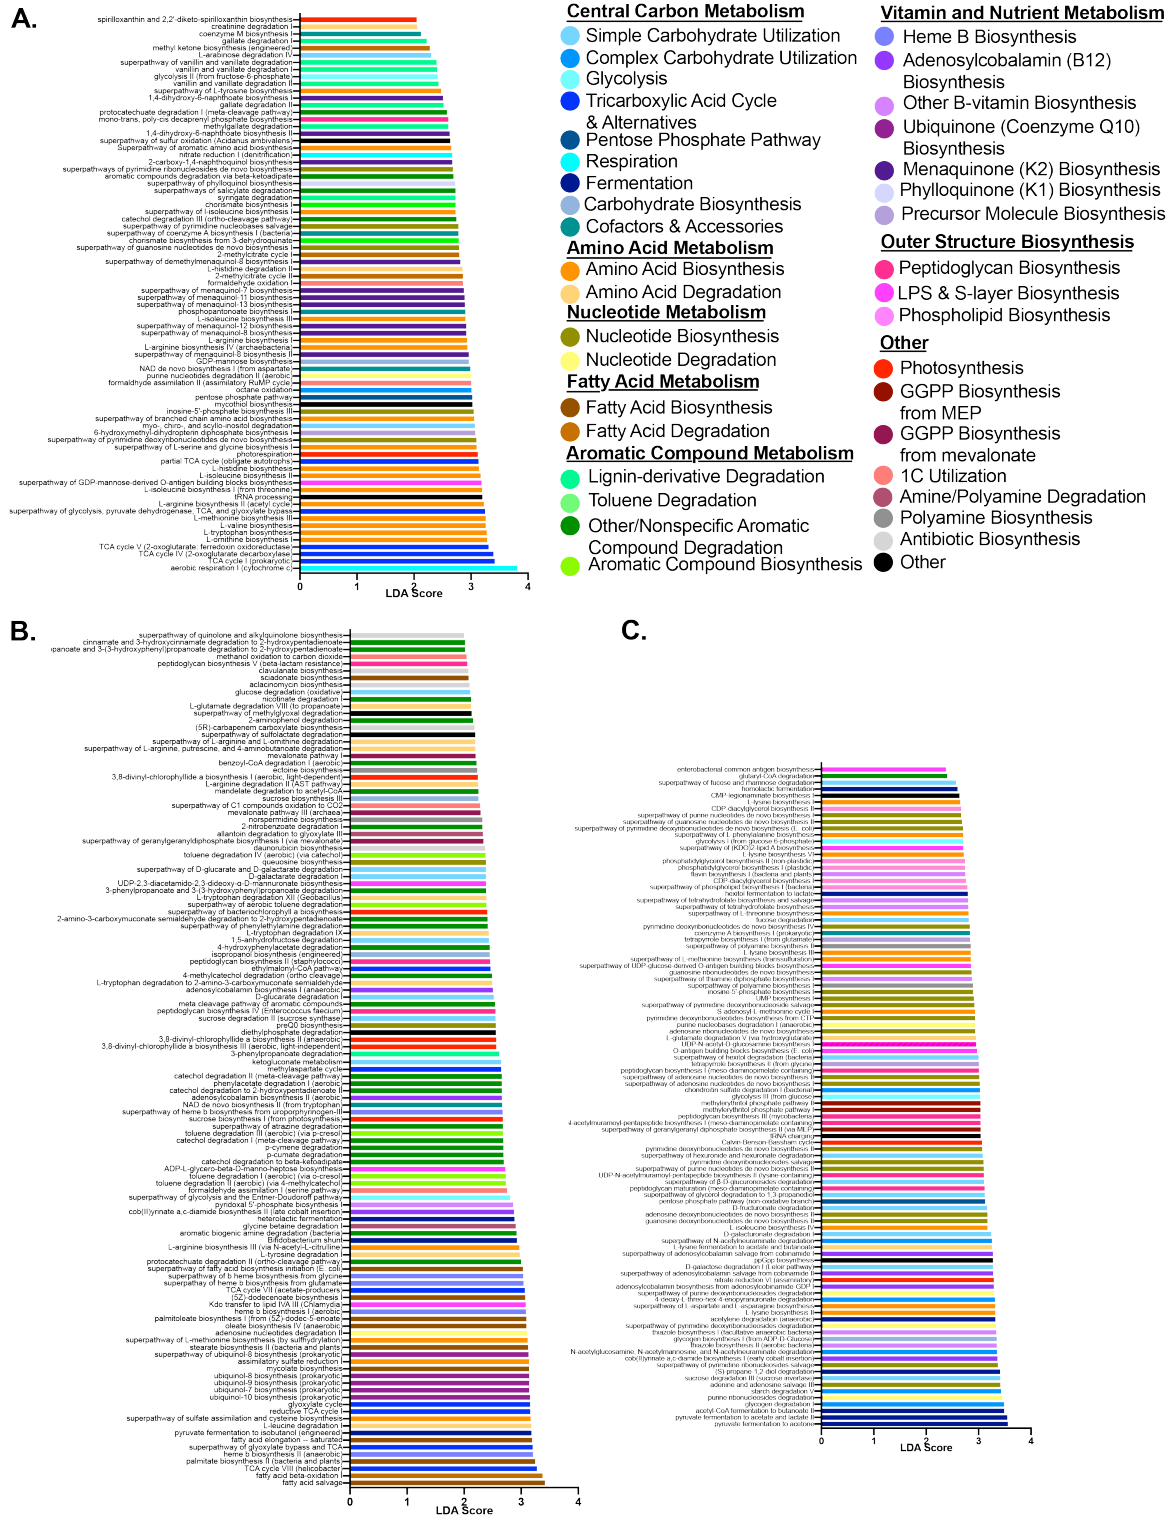

**Supplementary Data S1: Differences in Taxonomic Abundances Between Gut, SMS and Water Microbiomes.** Each tab includes the significant LDA and p-values calculated by LEfSe; Tab 1 delineates the family-level data and Tab 2 delineates the phyla-level data.

**Supplementary Data S2: Per-sample Relative Abundance Data.** Each tab includes different taxonomic level data; Tab 1 delineates phylum-level data, Tab 2 delineates class-level data, Tab 3 delineates order-level data, Tab 4 delineates family-level data, Tab 5 delineates genus-level data and Tab 6 delineates ASV-level data.

**Supplementary Data S3: Predicted Metagenomic Function: Specific Metacyc Pathways Associated with the Gut, SMS, and Water Microbiomes**
